# Supplementary material
Source: PubMed Central journal article supplement (PMC5703216)
Supplement: NIHMS920298-supplement-SI.pdf [file NIHMS920298-supplement-SI.pdf]

# **Electronic Supplementary Information for:**

## **Nanoparticle-induced oxidation of corona proteins initiates an oxidative stress response in cells**

*Dhanya T. Jayaram,<sup>a,‡</sup> Sabiha Runa,<sup>a,‡</sup> Melissa L. Kemp<sup>b,c</sup> and Christine K. Payne<sup>a,c,\*</sup>*

<sup>a</sup>School of Chemistry and Biochemistry, Georgia Institute of Technology, Atlanta, GA 30332, USA. <sup>b</sup>The Wallace H. Coulter Department of Biomedical Engineering, Georgia Institute of Technology and Emory University, Atlanta, GA 30332, USA. <sup>c</sup>Parker H. Petit Institute for Bioengineering and Biosciences, Georgia Institute of Technology, Atlanta, GA 30332, USA.

\*e-mail: [christine.payne@chemistry.gatech.edu](mailto:christine.payne@chemistry.gatech.edu)

‡ these authors contributed equally to this work.

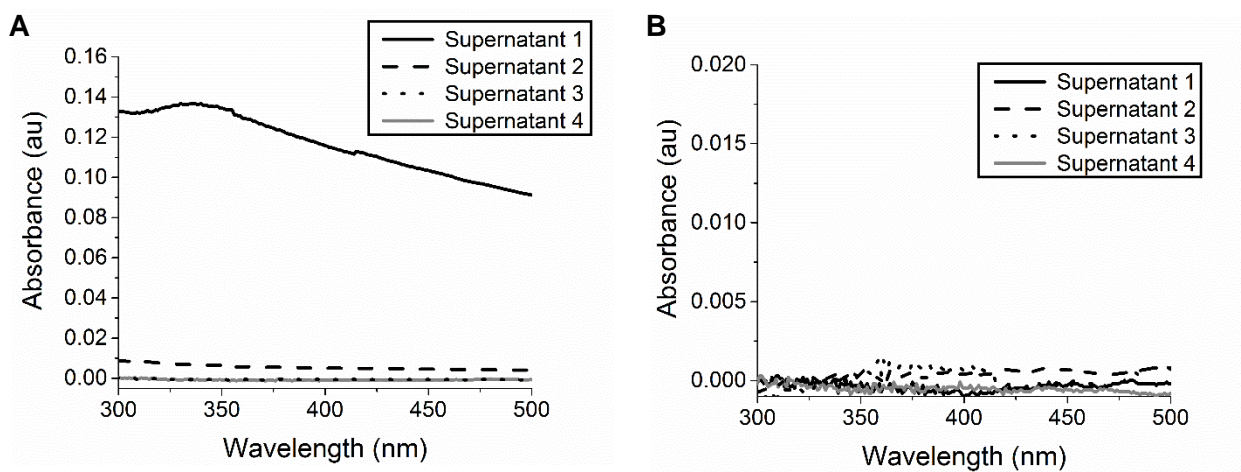

**Fig. S1** TiO<sub>2</sub> NP removal by centrifugation and concentration determination. (A) P25 and (B) E171 TiO<sub>2</sub> NPs were removed from solutions prior to light-based measurements using repeated (3x) centrifugation (8,000 rcf, 15 min). Supernatant 1 is the supernatant following the first centrifugation step. After 3 rounds (Supernatant 3) of centrifugation, no NPs are detected. Supernatant 3 was used for measurements. Supernatant 4 is shown for comparison.

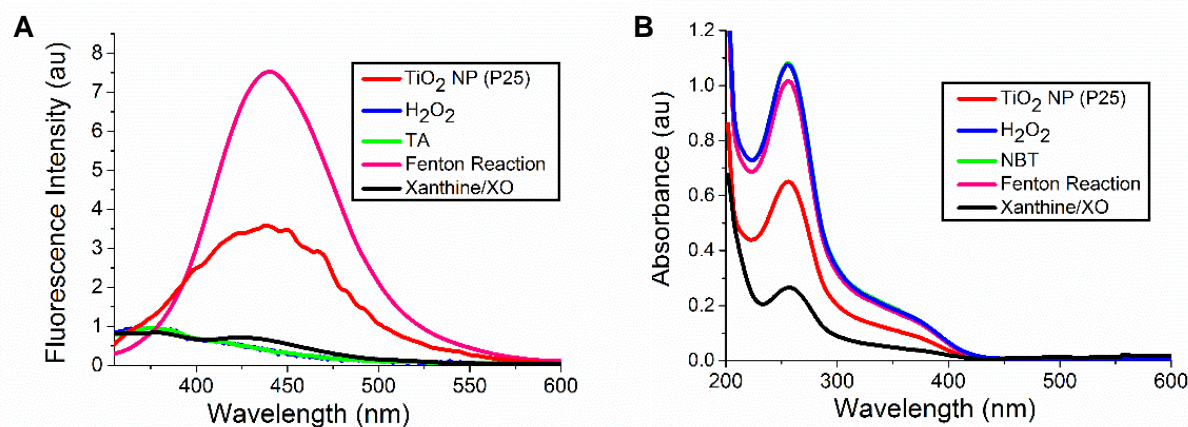

**Fig. S2** TA and NBT assays are specific to hydroxyl radicals and superoxide, respectively. (A) The selectivity of TA was confirmed using Fenton-generated hydroxyl radicals ( $\text{CuSO}_4$  (10  $\mu\text{M}$ ) and  $\text{H}_2\text{O}_2$  (1 mM), pink),  $\text{H}_2\text{O}_2$  (blue), and xanthine (300  $\mu\text{M}$ )/xanthine oxidase (XO, 0.01 U/mL)-generated superoxide (black). No emission was observed from TA alone (2 mM, green). (B) The selectivity of NBT was confirmed using xanthine (300  $\mu\text{M}$ )/xanthine oxidase (XO, 0.01 U/mL)-generated superoxide (black), Fenton-generated hydroxyl radicals ( $\text{CuSO}_4$  (10  $\mu\text{M}$ ) and  $\text{H}_2\text{O}_2$  (1 mM), pink), and  $\text{H}_2\text{O}_2$  (blue). No change was observed from NBT alone (2 mM, green). For both assays, measurements were made after a 1 hr incubation with  $\text{TiO}_2$  NPs or the relevant reagent.  $\text{TiO}_2$  NPs were removed (8000 rcf for 15 min) from the solution prior to measurement.  $\text{TiO}_2$  NP (1 mg/mL, red), TA, and NBT data are replotted from Figure 1 for comparison.

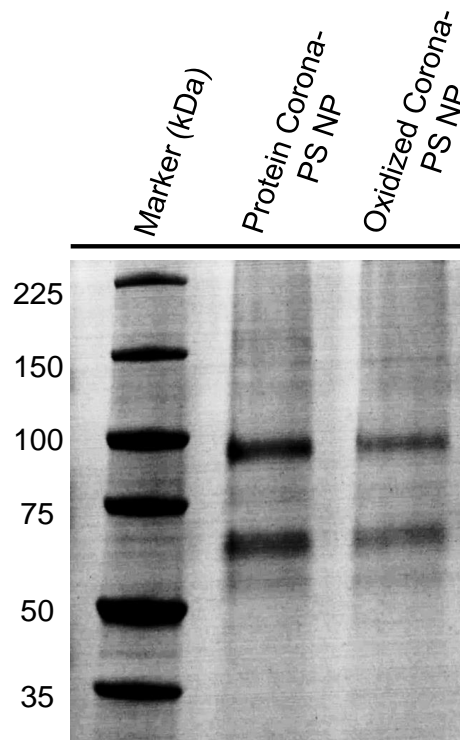

**Fig. S3** Gel electrophoresis was used to compare the corona formed on the surface of polystyrene (PS) NPs using FBS (unoxidized) or FBS oxidized by  $\text{TiO}_2$  NPs, as described in Section 2.8. To analyze the corona, unbound and weakly bound proteins were first removed from the protein-NP mixture by centrifugation (8,000 rcf, 15 min, x3). A detergent, SDS (Laemmli loading buffer, #BP-110R, Boston BioProducts, Ashland, MA; 5 min, vortexing) was used to remove the hard corona. Protein samples were heated for 5 min at 100 °C and then loaded onto a gel (tris-glycine SDS gel, #456-1094, Bio-Rad, Hercules, CA) for SDS-PAGE (230 V, 35 min). A 5-225 kDa molecular weight marker (Lonza ProSieve Unstained Protein Marker, #50547, VWR, Rockland, ME) was included. Gels were stained for 1 hr (SimplyBlue Safe Stain, #LC6060, ThermoFisher) and then imaged. Densitometric analysis (Image J; <http://rsb.info.nih.gov/ij/>) was used to compare the two protein coronas. Analysis was carried out for 3 distinct samples, a representative gel is shown. No differences between the two coronas were observed.

|                                 |           | <b>O 1s</b> |       |       |
|---------------------------------|-----------|-------------|-------|-------|
|                                 |           | O1          | O2    | O3    |
| <b>TiO<sub>2</sub> NP (P25)</b> | B.E. (eV) | 530.0       | 531.3 | 533.2 |
|                                 | Area (%)  | 73.3        | 11.5  | 15.2  |
| <b>Plasma-treated</b>           | B.E. (eV) | 530.6       | 531.0 | 536.3 |
|                                 | Area (%)  | 74.2        | 23.3  | 2.5   |
| <b>Passivated</b>               | B.E. (eV) | 530.2       | 531.7 | 532.5 |
|                                 | Area (%)  | 35.9        | 0.7   | 63.3  |

**Table S1.** XPS characterization of surface-modified TiO<sub>2</sub> NPs. Binding energies (B.E.) and % area under the curve are shown for unmodified, plasma-treated, and surface passivated TiO<sub>2</sub> NPs.

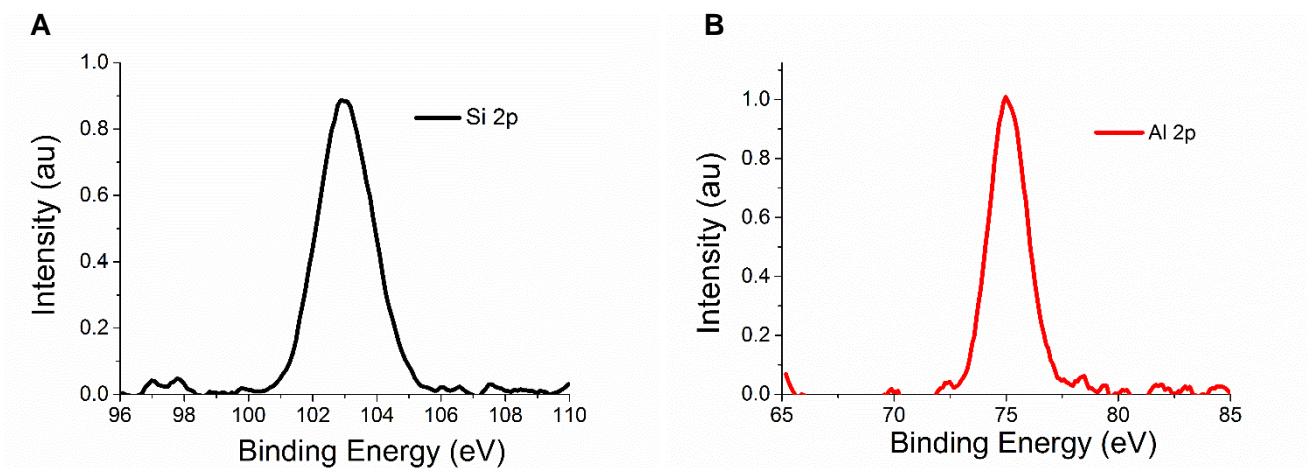

**Fig. S4** XPS of surface passivated TiO<sub>2</sub> NPs. XPS measured for (A) Si 2p and (B) Al 2p confirms that TiO<sub>2</sub> NPs (P25) were passivated with a silica-aluminum shell on the NP surface. Measurements were carried on 4 distinct samples (2 mg/mL, dried), representative spectra are shown.

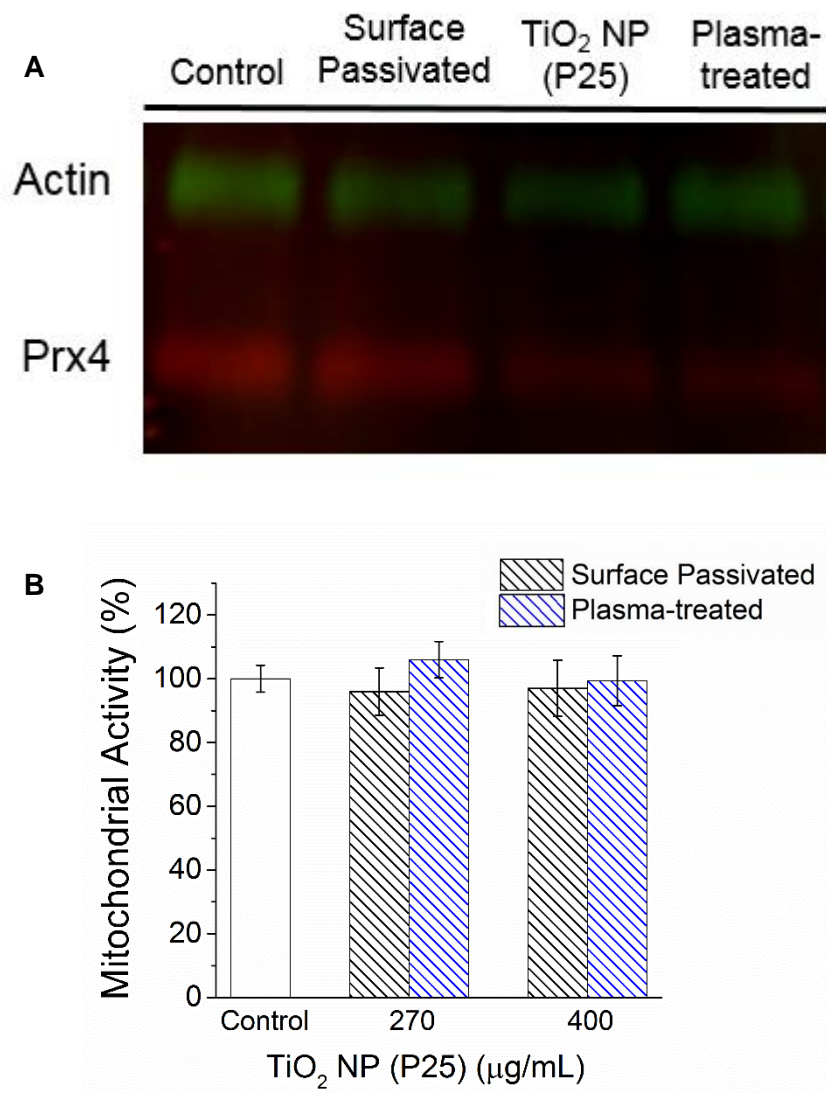

**Fig. S5** Cellular response to plasma-treated and surface passivated TiO<sub>2</sub> NPs. (A) Representative western blot of peroxiredoxin 4 (Prx4, red) following incubation with TiO<sub>2</sub> NPs (400 µg/mL 24 hrs, red). Actin (green) was used as a housekeeping control. Cells lacking NPs (Control) were incubated with standard cell culture media (MEM + 10% FBS). This blot is representative of three trials with densitometric analysis shown in Figure 4D. (B) Cytotoxicity. An MTT assay of mitochondrial enzyme activity was used to ensure that the concentration of plasma-treated and surface passivated TiO<sub>2</sub> NPs (270 µg/mL, 12-well plate, 24 h incubation) did not lead to decreased cell health. Measurements are the average of three wells and error bars represent ± standard deviation. MTT activity (%) is normalized against a control in the absence of NPs. There was no significant difference between the control and the concentration of TiO<sub>2</sub> NPs used for experiments (400 µg/mL), which was used to confirm that we were working in a non-cytotoxic regime.

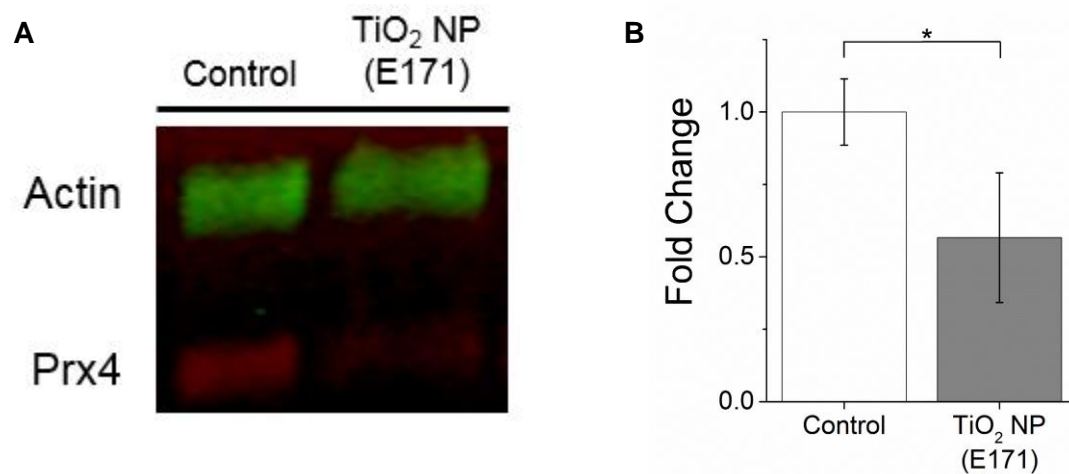

**Fig. S6** Food grade E171 TiO<sub>2</sub> NPs induce oxidative stress. (A) Representative western blot of peroxiredoxin 4 (Prx4, red) following incubation with E171 TiO<sub>2</sub> NPs (400 µg/mL 24 hrs, red). Actin (green) was used as a housekeeping control. Cells lacking NPs (Control) were incubated with standard cell culture media (MEM + 10% FBS). This blot is representative of three trials. (B) Densitometric analysis, \*p<0.05.
